# Supplementary material
Source: publisher site journal article supplement (https://www.dovepress.com/article/280253)
Supplement: Supplementary file 1 [file get_supplementary_file.php]

## Supplementary material

## Supplementary file S1: Questionnaires and observation check lists

## Jimma University

## Faculty of health sciences

## School of pharmacy

Questionnaires and observation check lists to collect data to assess anti-tuberculosis commodities management performance and factors affecting it at public health facilities in Dire Dawa city administration, Ethiopia

Questionnaires/check lists ID.No.____________

Introduction

Good morning/afternoon, my name is -------------------------------- I am working in Jimma University. I am a member of a research group working in this University. I am studying anti-tuberculosis commodities management performance and factors affecting it at public health facilities in Dire Dawa city administration, Ethiopia by asking questions. Your appropriate answers for all of these questions are important. The results of this study hope fully will improve the inventory management performances of the health facilities. Your answers will be confidential and keep in secret. If you decide that, you do not want to participate in the study now or at any time in the future; it is your right not to participate in the study. But we appreciate if you participate and will take 20 minutes for us to complete the questionnaire.

Thank you.

Do I have your permission to continue?

If yes, thank you and continue --------------

If no, thank you and go to next study subject --------------

Data collector

Name ----------------------- signature ------------------------ date -------------------

Checked by supervisor

Name --------------------- signature---------------------- date-------------------

Instruction: First ask to speak to head of the pharmacy. After explaining your purpose ask the following questions, then visit the warehouse, storeroom or other storage area. If you are referred to another staff member keep telling the purpose of the visit before data collection.

**Part 1:** Facility Services and Infrastructure

| No. | Question | Code  Classification | Go To/ Comment |
| --- | --- | --- | --- |
| 1 | Name of the health facility |  |  |
| 2 | Region |  |  |
| 3 | Type of facility | 1. Hospital  2.Health center |  |
| 4 | Provide TB Service | 1.Yes  0.No |  |
| 5 | Product Delivery Modalities from PFSA | 1.Direct  2.Indirect |  |

**Part 2:** Background Characteristics of the Respondent (ask pharmacy unit coordinator)

| **No.** | **Question** | **Code Classification** | **Go to/ comment** |
| --- | --- | --- | --- |
| 1 | Title and mobile phone number of person interviewed for this survey | Title: _______________________  Mobile number: ______________ |  |
| 2 | Number of years and months you have worked at this facility? | Years: ______ Months:________ |  |
| 3 | What is your profession | Nurse..........................................1  Clinical Officer....................... 2  Druggist………………………...3  Pharmacist.................................4  Other (Specify) _____________9 |  |
| 4 | How many staff the facility has under the pharmacy unit? | # of pharmacy unit staff /___/ |  |
| 5 | Educational qualification of pharmacy unit staff | #of staff with Degree /_______/  #of staff with Diploma/_______/  Other # /_______/ |  |
| 6 | How many of them are trained in IPLS, warehouse management, laboratory commodity management? | Number trained on IPLS____ warehouse management___ laboratory commodity management _____ other _________specify_____ |  |

**Part 3:** Background Characteristics of the Respondent (Ask the store manager)

| **No.** | **Questions** | **Code Classification** | **Go To/**  **Comments** |
| --- | --- | --- | --- |
| 1 | Name title and mobile phone number of person interviewed for this survey | Name: ___________________  Title: ____________________  Mobile number: ___________ |  |
| 2 | Number of years and months you have worked at this facility? | Years: ______  Months:____________ |  |
| 3 | What is your profession | Nurse......................................1 Clinical Officer....................... 2  Druggist………….……………………3  Pharmacist..............................4  Other (Specify) ___________9 |  |
| 4 | Type of training you(the store manager )trained | IPLS…………………………………1  warehouse management…2 LCM management………………..3 other(specify)……………..4 |  |
| 5 | Are you responsible for managing TB drugs at this facility? (Multiple responses are possible.) | Yes_____________________1  No _____________________0 | If no who is  responsible list down |
| 6 | Are you responsible for managing TB laboratory reagents that are used for AFB testing at this facility? | Yes_____________________1  No _____________________0 | If no who is responsible list down |
| 7 | Are you responsible for managing TB laboratory supplies that are used for AFB testing at this facility? | Yes_____________________1  No _____________________0 | If no who is responsible list down |

**Part 4:** LMIS related questions (ask store manager for commodities s/he is responsible)

| **No.** | **Questions** | **Code**  **Classification** | **Go To/**  **Comment** |
| --- | --- | --- | --- |
| 1 | Do you use the following stock keeping logistics forms to manage health products in this facility? | | |
|  | A. bin card/ inventory control card | Yes……….... 1  No…………. 0 |  |
| B. stock ledger | Yes………… 1  No…………. 0 |  |
| C. other | Yes……….... 1  No…………. 0 |  |
| 2 | What LMIS forms do you use for reporting/ordering? | | |
|  | A. Reporting and requisition from (RRF) | Yes……….. 1  No …….,…. 0 |  |
| B. Internal facility reporting and requisition from (IFRR) | Yes ………. 1  No ………… 0 |  |
| C. Automated system(HCMIS) or electronic RRF | Yes……........ 1  No …………..0 |  |
| D. other | Yes (specify) 1  No …………..0 |  |
| 3 | If your answer to Q 2C is yes, have you faced challenge in using the computerized LMIS | Yes…………..1  No…………….0 |  |

| 4 | Do LMIS report forms include the following? | | | | | | |
| --- | --- | --- | --- | --- | --- | --- | --- |
|  | A. stock on hand | | | Yes…………..1  No……………0 | |  | |
| B. quantities used | | | Yes…………..1  No……………0 | |  | |
| C. losses and adjustments | | | Yes…………..1  No……………0 | |  | |
| 5 | Does a completed LMIS report include the following? (must be verified with completed report) | | | | | | |
|  | A. stock on hand | Yes…………..1  No……………0  Completed report not available…… 9 | | |  | |  |
| B. quantities used | Yes ………….1  No…………. 0  Completed report not available…… 9 | | |  | |  |
| C. losses and adjustments | Yes ………….1  No…………. 0  Completed report not available…… 9 | | |  | |  |
| 6 | How often are these LMIS reports sent to the higher level?  (Circle all that apply.) | | | | Monthly............A  Bi Monthly........B  Quarterly...........C  Other………………D | |  |
| 7 | When was the last time you sent an order/report for products at this facility? | | Never…………………………………….1  Within the last month................2  Two months ago……………………..3  Three months ago…………………..4 More than 3 months ago………..5 | |  | |  |
| 8 | How do you transmit your report/order to the higher level | | Send by facility vehicle……….1  Picked up by higher level……..2  Other (specify)…………………….3 | |  | |  |
| 9 | How did you learn to complete the forms/records used at this  facility?(circle all that apply) | | During a logistics workshop…….A  On-the-job training …………..….B  Never been trained……………….C  Other (specify)……..……………W | |  | |  |
|  | |  |
| 10 | Is there written SOP for LMIS practice of all products | | | | Yes ……………1  No …………….0 | |  |
| 11 | How many emergency orders for anti TB commodities have you placed in the last 6 months? (specify for which commodity you placed) | | | | None…………..0  1……………….1  2……………….2  3……………….3 | |  |
| 12 | Does the laboratory unit use the following LMIS formats(must be confirmed) | | | | | | |
|  | Bin card | | | Yes ………….1  No …………..0 | |  | |
| IFRR | | | Yes ……….…1  No …………..0 | |  | |
| 13 | Does the TB unit use the following LMIS formats(must be confirmed) | | | | | | |
|  | Bin card | | | Yes ………….1  No …………..0 | |  | |
| IFRR | | | Yes ………….1  No …………..0 | |  | |

**Part 5:** Inventory management related (ask pharmacy store manager for commodities s/he is responsible to manage)

| **No.** | **Questions** | **Code Classification** | **Go To/**  **Comment** |
| --- | --- | --- | --- |
| 1 | What are the direct sources of supply for the following program commodities at this facility? (Multiple responses are possible.) | |  |
|  | Anti TB drugs | PFSA_________________________1  RHB/regional laboratory__________2  Other (specify)__________________3 |  |
| TB laboratory reagents | PFSA_________________________1  RHB/regional laboratory__________2  Other (specify)__________________3 |  |

|  | TB laboratory supplies | PFSA_________________________1  RHB/regional laboratory__________2  Other (specify)__________________3 |  |
| --- | --- | --- | --- |
| 2 | Who determines this facility’s anti TB commodities resupply quantities?  (Circle all that apply.) | |  |
|  | Anti TB drugs | The facility itself …………………A  PFSA……………………………...B  RHB/regional laboratory……………C  Don’t know…………………………D  Other _______________________W |  |
| TB laboratory reagents | The facility itself …………………A  PFSA……………………………...B  RHB/regional laboratory……………C  Don’t know…………………………D  Other_______________________W |  |
| TB laboratory supplies | The facility itself …………………A  PFSA……………………………...B  RHB/regional laboratory……………C  Don’t know…………………………D  Other _______________________W |  |
| 3 | How are the facility’s resupply quantities determined? | |  |
|  | For Anti TB drugs | Formula (any calculation)_______ 1  Don’t know………………………..2  Other means……………………….3 |  |
| For TB laboratory reagents | Formula (any calculation)_______ 1  Don’t know………………………..2  Other means……………………….3 |  |
| For TB laboratory supplies | Formula (any calculation)_______ 1  Don’t know………………………..2  Other means……………………….3 |  |
| 4 | What factors affect the quantities you order? | Past consumption............................1  Size of the store..............................2 |  |

|  |  | | service report.....................................3  Other…………………...………….4 |  |
| --- | --- | --- | --- | --- |
| 5 | Who is responsible for transporting products to your facility? (Circle all that apply.) | | Local supplier delivers …………...A  Higher level delivers …………......B  This facility collects………………C  Other(specify).................................D |  |
| 6 | What type of transportation is most often used? | | Facility vehicle …….. 1  Public transportation ………2  PFSA …………3  Motorcycle…………. 4  other (specify) ………….5 |  |
| 7 | On average, approximately how long does it take between ordering and receiving products for products you manage? | | Less than 2 weeks……….. 1  Two weeks to 1 month ……… 2  Between 1 and 2 months….. 3  More than 2 months ……. 4 |  |
| 8 | When did you receive your most recent supervision visit? | | Never received…….. 1  Within the last month ………2  1 - 3 months ago……. 3  3 - 6 months ago …….4  More than 6 months ago ……5  Other (specify) ….. 9 |  |
| 9 | How often do you take stock taking | | Any time during issuing ………..…1  Monthly …………………….….….2  Bi monthly …………………………3  Quarterly ……………………………4  Annually………………………..…5 |  |
| 10 | Are there certain commodities that you always stock out of before  resupply?(drugs, reagents, supplies) | Yes……..…….1  No…………… 0 | | IF NO skip Q no 12 |
| 11 | List the commodities you stock out of most frequently (up to 3 products). | 1._______________ 2._______________  3._______________ | |  |
| 12 | Is there written guidelines for storage and handling of all products (e.g., manuals, posters, etc.)? | Yes………………1  No …………….0 | |  |

**Part 6:** Report and Requisition Form accuracy assessing checklist

|  |  |  | | **Usable Stock on Hand (at time of most recent LMIS report)** | | | | | | | | | | |
| --- | --- | --- | --- | --- | --- | --- | --- | --- | --- | --- | --- | --- | --- | --- |
|  |  | **Unit** | | **Managed**  **at this**  **HF(Y/N)(1)** | | | **According to most recent**  **RRF report(2)** | | **From BC from time of RRF report(3)** | | | **Reason for discrepancy** | | |
| 1 | E 400mg |  | |  | | |  | |  | | |  | | |
| 2 | E- 100mg |  | |  | | |  | |  | | |  | |  |
| 3 | INH 100mg |  | |  | | |  | |  | | |  | |  |
| 4 | INH -300mg |  | |  | | |  | |  | | |  | |  |
| 5 | RH-75mg/50mg |  | |  | | |  | |  | | |  | |  |
| 6 | RHZ75/50/150mg) |  | |  | | |  | |  | | |  | |  |
| 7 | RHZE/RH kit |  | |  | | |  | |  | | |  | |  |
| 8 | Capreomycine 1gm |  | |  | | |  | |  | | |  | |  |
| 9 | Cycloserine 250mg |  | |  | | |  | |  | | |  | |  |
| 10 | Prothionamide250mg |  | |  | | |  | |  | | |  | |  |
| 11 | Levofloxacin 250mg |  | |  | | |  | |  | | |  | |  |
| 12 | Pyrazinamide 400mg |  | |  | | |  | |  | | |  | |  |
| 13 | PAS 4 gm |  | |  | | |  | |  | | |  | |  |
| 14 | Kanamycin 1gm |  | |  | | |  | |  | | |  | |  |
| 15 | Moxifloxacine 400mg |  | |  | | |  | |  | | |  | |  |
| **Laboratory reagents and consumables for facilities using Zeihel-Neelsen staining technique** | | | | | | | | | | | | | | |
| 16 | 3 % Acid Alcohol |  | |  | |  | |  | | |  | | |  |
| 17 | 1% basic carbol fuchsin |  | |  | |  | |  | | |  | | |  |
| 18 | 0.1% Methylene blue |  | |  | |  | |  | | |  | | |  |
| 19 | Oil Immersion |  | |  | |  | |  | | |  | | |  |
| 20 | Frosted end microscope slide |  | |  | |  | |  | | |  | | |  |
| 21 | Applicator wooden without cotton |  | |  | |  | |  | | |  | | |  |
| 22 | Filter paper |  | |  | |  | |  | | |  | | |  |
| 23 | Lens cleaning solution |  | |  | |  | |  | | |  | | |  |
| 24 | Lens paper |  | |  | |  | |  | | |  | | |  |
|  | **For health facilities who have gene Xpert machine** | | | | | | | | | | | | | |
| 25 | Expert MTB/RIF  Cartridges |  | |  | |  | |  | | |  | | |  |
| 26 | Falcon tube 50 ml |  | |  | |  | |  | | |  | | |  |
|  | **Laboratory reagents and consumables for facilities using Fluorescence Microscope** | | | | | | | | | | | | | |
| 27 | 1% Aura mine O in alcohol |  |  | |  | | |  | |  | | |  | |
| 28 | phenol solution for  Aura mine O |  |  | |  | | |  | |  | | |  | |
| 29 | 0.5% Acid alcohol |  |  | |  | | |  | |  | | |  | |
| 30 | 0.3% methylene blue |  |  | |  | | |  | |  | | |  | |
| 31 | Filter paper |  |  | |  | | |  | |  | | |  | |
| 32 | Sputum cup |  |  | |  | | |  | |  | | |  | |
| 33 | Wooden applicator sticks without cotton |  |  | |  | | |  | |  | | |  | |
| 34 | Microscope Frosted end slides |  |  | |  | | |  | |  | | |  | |

**Part 7:** Percentage Difference between Quantity Ordered and Quantity Received

|  | **Anti TB drug and reagent** | **unit** | | **Quantity**  **Ordered For**  **Last Order**  **Period** | | **Date**  **Order**  **Placed** | | **Quantity Receive**  **d in last order** | | **Date**  **Order Received** | |
| --- | --- | --- | --- | --- | --- | --- | --- | --- | --- | --- | --- |
| 1 | Ethambutol (E) 400mg |  | |  | |  | |  | |  | |
| 2 | Ethambutol (E)- 100mg |  | |  | |  | |  | |  | |
| 3 | Isoniazid (INH) 100mg |  | |  | |  | |  | |  | |
| 4 | Isoniazid (INH) -300mg |  | |  | |  | |  | |  | |
| 5 | RH- (75mg/50mg) for Pedi |  | |  | |  | |  | |  | |
| 6 | RHZ - (75mg/50mg/150mg) |  | |  | |  | |  | |  | |
| 7 | RHZE(150mg/75mg/400mg/275mg) and RH - (150mg + 75mg) |  | |  | |  | |  | |  | |
| 8 | Capreomycine 1gm |  | |  | |  | |  | |  | |
| 9 | Cycloserine 250mg tablet |  | |  | |  | |  | |  | |
| 10 | Prothionamide 250mg tab |  | |  | |  | |  | |  | |
| 11 | Levofloxacin 250mg tablet |  | |  | |  | |  | |  | |
| 12 | Pyrazinamide 400mg tablet |  | |  | |  | |  | |  | |
| 13 | PAS 4 gm |  | |  | |  | |  | |  | |
| 14 | Kanamycin 1gm vial |  | |  | |  | |  | |  | |
| 15 | Moxifloxacine 400mg tablet |  | |  | |  | |  | |  | |
|  | **Laboratory commodities for facilities using Zeihel-Neelsen Staining Technique** | | | | | | | | | | |
| 16 | 3 % Acid alcohol | |  | |  | |  | |  | |  |
| 17 | 1% basic carbol fuchsin | |  | |  | |  | |  | |  |
| 18 | 0.1% Methylene blue | |  | |  | |  | |  | |  |
| 19 | Oil Immersion | |  | |  | |  | |  | |  |
| 20 | Frosted end microscope slide | |  | |  | |  | |  | |  |
| 21 | Applicator wooden without cotton | |  | |  | |  | |  | |  |
| 22 | Filter paper | |  | |  | |  | |  | |  |
| 23 | Lens cleaning solution | |  | |  | |  | |  | |  |
| 24 | Lens paper | |  | |  | |  | |  | |  |
|  | **For HF who have gene Xpert machine** | | | | | | | |  | |  |
| 25 | Xpert MTB/RIF Cartridges | |  | |  | |  | |  | |  |
| 26 | Falcon tube 50 ml | |  | |  | |  | |  | |  |
|  | **Laboratory reagents and consumables for facilities using Fluorescence Microscope** | | | | | | | | | | |
| 27 | 1% Aura mine O in alcohol | |  | |  | |  | |  | |  |
| 28 | phenol solution for Aura mine O | |  | |  | |  | |  | |  |
| 29 | 0.5% Acid alcohol solution | |  | |  | |  | |  | |  |
| 30 | 0.3% methylene blue | |  | |  | |  | |  | |  |
| 31 | Filter paper | |  | |  | |  | |  | |  |
| 32 | Sputum cup | |  | |  | |  | |  | |  |
| 33 | W. applicator sticks without cotton | |  | |  | |  | |  | |  |
| 34 | Frosted end microscope slides | |  | |  | |  | |  | |  |

**Part 8:** Questioner to assess IFRR related questions

| **S.No.** | **DUs** | **Frequency of**  **IFRR report** |  | **Expected no**  **of report** | **Actually submitted report** | **No of IFRR that is complete which contains the 4 essential data’s** |
| --- | --- | --- | --- | --- | --- | --- |
| **1** | TB clinic |  |  |  |  |  |
| **2** | Laboratory unit |  |  |  |  |  |

**Part 9:** Questioner to assess RRF completeness

|  | RRF  includ es | Beginni ng balance | Quantity received | Loss/adj ustment | Ending balance | SOH at store | Calculated consumption | Days out of stock | Maximu m  quantity | Quanti ty to reach max | Quantity ordered |
| --- | --- | --- | --- | --- | --- | --- | --- | --- | --- | --- | --- |
| 1 | Yes |  |  |  |  |  |  |  |  |  |  |
| 2 | No |  |  |  |  |  |  |  |  |  |  |

**Part 10:** Stock Status in the last six months and the day of visit

| Product | Units of count | Managed at this facility? | Bin card    available?    (  )  Y/N | Bin  card    updated? (Y/N) | Balance on Bin card | Stock out most recent 6  months (Y/N) | #    of stock outs | Total number of days | Total issued (most recent  6 months) | #    of months of data  available | Physical ;inventory  —    Store room | Stock out    today? (Y/N) | Quantity of    expired  products |
| --- | --- | --- | --- | --- | --- | --- | --- | --- | --- | --- | --- | --- | --- |
| Ethambutol (**E**) 400mg |  |  |  |  |  |  |  |  |  |  |  |  |  |
| Ethambutol (**E**)- 100mg |  |  |  |  |  |  |  |  |  |  |  |  |  |
| Isoniazid (**INH**) 100mg |  |  |  |  |  |  |  |  |  |  |  |  |  |
| Isoniazid (**INH**) -300mg |  |  |  |  |  |  |  |  |  |  |  |  |  |
| **RH**- (75mg/50mg) for Pedi |  |  |  |  |  |  |  |  |  |  |  |  |  |
| **RHZ** - (75mg/50mg/150mg) |  |  |  |  |  |  |  |  |  |  |  |  |  |
| **RHZE**(150mg/75mg/400mg/275mg) and **RH** - (150mg + 75mg) |  |  |  |  |  |  |  |  |  |  |  |  |  |
| Capreomycine 1gm |  |  |  |  |  |  |  |  |  |  |  |  |  |
| Cycloserine 250mg tablet |  |  |  |  |  |  |  |  |  |  |  |  |  |
| Prothionamide 250mg tab |  |  |  |  |  |  |  |  |  |  |  |  |  |
| Levofloxacin 250mg tablet |  |  |  |  |  |  |  |  |  |  |  |  |  |
| Pyrazinamide 400mg tablet |  |  |  |  |  |  |  |  |  |  |  |  |  |
| PAS 4 gm |  |  |  |  |  |  |  |  |  |  |  |  |  |
| Kanamycin 1gm vial |  |  |  |  |  |  |  |  |  |  |  |  |  |
| Moxifloxacine 400mg tablet |  |  |  |  |  |  |  |  |  |  |  |  |  |

| Product | Units of count | Managed at this facility? | Bin card available?    (  )  Y/N | Bin card updated? (Y/N) | Balance on Bin card | Stock out most recent 6  months (Y/N) | #    of stock outs | Total number of days | Total issued (most recent  6 months) | #    of months of data  available | Physical ;inventory  —    Store room | Stock out today? (Y/N) | Quantity of expired  products |
| --- | --- | --- | --- | --- | --- | --- | --- | --- | --- | --- | --- | --- | --- |
| **Laboratory commodities for facilities using Zeihel-Neelsen Staining Technique** | | | | | | |  |  |  |  |  |  |  |
| 3 % Acid alcohol |  |  |  |  |  |  |  |  |  |  |  |  |  |
| 1% basic carbol fuchsin |  |  |  |  |  |  |  |  |  |  |  |  |  |
| 0.1% Methylene blue |  |  |  |  |  |  |  |  |  |  |  |  |  |
| Oil Immersion |  |  |  |  |  |  |  |  |  |  |  |  |  |
| Frosted end microscope slide |  |  |  |  |  |  |  |  |  |  |  |  |  |
| Applicator wooden without cotton |  |  |  |  |  |  |  |  |  |  |  |  |  |
| Filter paper |  |  |  |  |  |  |  |  |  |  |  |  |  |
| Lens cleaning solution |  |  |  |  |  |  |  |  |  |  |  |  |  |
| Lens paper |  |  |  |  |  |  |  |  |  |  |  |  |  |
| **For HF who have gene Xpert machine** | | | | | | | |  |  |  | | |  |
| Xpert MTB/RIF Cartridges |  |  |  |  |  |  |  |  |  |  |  |  |  |
| Falcon tube 50 ml (Leak proof sputum) |  |  |  |  |  |  |  |  |  |  |  |  |  |
| 1% Aura mine O in alcohol |  |  |  |  |  |  |  |  |  |  |  |  |  |
| **Laboratory reagents and consumables for facilities using Fluorescence Microscope** | | | | | | | |  |  |  |  |  |  |
| Product | Units of count | Managed at this facility? | Bin card available?    (  )  Y/N | Bin card updated? (Y/N) | Balance on Bin card | Stock out most recent 6  months (Y/N) | #    of stock outs | Total number of days | Total issued (most recent  6 months) | #    of months of data  available | Physical ;inventory  —    Store room | Stock out today? (Y/N) | Quantity of expired  products |
| phenol solution for Aura mine O |  |  |  |  |  |  |  |  |  |  |  |  |  |
| 0.5% Acid alcohol solution |  |  |  |  |  |  |  |  |  |  |  |  |  |
| 0.3% methylene blue |  |  |  |  |  |  |  |  |  |  |  |  |  |
| Filter paper |  |  |  |  |  |  |  |  |  |  |  |  |  |
| Sputum cup |  |  |  |  |  |  |  |  |  |  |  |  |  |
| Wooden applicator sticks without cotton |  |  |  |  |  |  |  |  |  |  |  |  |  |
| Frosted end microscope slides |  |  |  |  |  |  |  |  |  |  |  |  |  |

**Part 11.** Storage Conditions: Place a check mark in the appropriate column based on visual inspection of the storage facility; note any relevant observations in the comments column**.** *To qualify as “yes,” all products and cartons must meet the criteria for each item.*

| **No** | **Description** | **Yes** | **No** | **Comments** |
| --- | --- | --- | --- | --- |
| 1 | Products are arranged on shelves with arrows pointing up, and identification labels and expiry dates and/or manufacturing dates are visible. |  |  |  |
| 2 | Products are stored and organized in a manner accessible for first-to-expire, first-out (FEFO) counting and general management. |  |  |  |
| 3 | Cartons and products are in good condition, not crushed due to mishandling. If cartons are open, determine if products are wet or cracked due to heat/radiation (fluorescent lights in the case of condoms, cartons right-side up for Depo-Provera®). |  |  |  |
| 4 | The facility makes it a practice to separate damaged and/or expired products from usable products and removes them from inventory. |  |  |  |
| 5 | Products are protected from direct sunlight. |  |  |  |
| 6 | Cartons and products are protected from water and humidity. |  |  |  |
| 7 | Storage area is visually free from harmful insects and rodents. (Check the storage area for traces of bats and/or rodents [droppings or insects].) |  |  |  |
| 8 | Storage area is secured with a lock and key, but is accessible during normal working hours; access is limited to authorized personnel. |  |  |  |
| 9 | Products are stored at the appropriate temperature according to product temperature specifications. |  |  |  |
| 10 | Roof is maintained in good condition to avoid sunlight and water penetration. |  |  |  |
| 11 | Storeroom is maintained in good condition (clean, all trash removed, sturdy shelves, organized boxes). |  |  |  |
| 12 | The current space and organization is sufficient for existing products and reasonable expansion (i.e., receipt of expected product deliveries for foreseeable future). |  |  |  |

**Part 12:** Product wastage (July 2018 to March 2019)

1. Identify Model numbers of pharmaceuticals received in the specified years
2. Record the quantity of pharmaceuticals expired/damaged in the specified year
3. Take the unit price of each expired product from model 19; if not available, take the current price
4. Calculate cost of pharmaceuticals lost due to expiry, damage and loss for all pharmaceuticals

Note: The total value of pharmaceuticals expired in the specified year from disposal registration form if expired drugs were disposed

| S.N | Name of  item | unit | Quantity | Unit price | Total price | remark |
| --- | --- | --- | --- | --- | --- | --- |
|  |  |  |  |  |  |  |
| 1 |  |  |  |  |  |  |
|  |  |  |  |  |  |  |
| 2 |  |  |  |  |  |  |
|  |  |  |  |  |  |  |
| 3 |  |  |  |  |  |  |
|  |  |  |  |  |  |  |
| 4 |  |  |  |  |  |  |
|  |  |  |  |  |  |  |
| 5 |  |  |  |  |  |  |

**Qualitative part (in depth interview) with key informants**

**ASK pharmacy store managers**

What are the challenges related to inventory management practice in the store? With regard to

- - Human resource
  - Capacity building and Information
  - Management support
  - Logistics(resources) needed
  - Other challenges

**Ask pharmacy unit coordinators**

What are the challenges associated with pharmacy unit in relation to inventory management? With regard to

- - Human resource
  - Capacity building and Information
  - Management support
  - Logistics(resources) needed
  - Other challenges

**Ask for laboratory unit coordinators**

What are the challenges associated with laboratory unit in relation to inventory management? With regard to

- - Inventory management
  - LMIS of TB laboratory reagents
  - Other challenges
